# Supplementary material for: Evaluation of a commercial synthetic computed tomography generation solution for magnetic resonance imaging‐only radiotherapy
Source: PubMed Central journal article supplement (PMC8200507; doi:10.1002/acm2.13236), 2021-05-27
Supplement: ACM2-22-191-s001.pdf [file ACM2-22-191-s001.pdf]

*Supplemental Table 1: MRI simulation scanning parameters for prostate group including current sequences used for anatomic segmentation (black) and additional sequences needed for s-CT generation (blue)*

| Sequence                  | Acquisition<br>Time (min) | BW<br>(Hz/Px) | TE<br>(ms) | TR<br>(ms) | FA (°) | Resolution<br>(mm x mm x mm) | ST<br>(mm) | FOV<br>(mm) |
|---------------------------|---------------------------|---------------|------------|------------|--------|------------------------------|------------|-------------|
| <b>AX T2<br/>SPACE 3D</b> | 6.45                      | 558           | 132        | 1600       | 170    | 1.0 x 1.0 x 1.0              | 1          | 450         |
| <b>T2 AX<br/>BLADE 2D</b> | 5.17                      | 446           | 78         | 6450       | 150    | 0.8 x 0.8 x 3.0              | 3          | 240         |
| <b>DIXON 3D</b>           | 2.15                      | 1010          | 2.39       | 6.27       | 15     | 2.0 x 2.0 x 2.0              | 2          | 448         |
