# Supplementary material for: Evaluation of a commercial synthetic computed tomography generation solution for magnetic resonance imaging‐only radiotherapy
Source: PubMed Central journal article supplement (PMC8200507; doi:10.1002/acm2.13236), 2021-05-27
Supplement: ACM2-22-191-s003.pdf [file ACM2-22-191-s003.pdf]

Supplemental Table 2: MRI simulation scanning parameters for brain group including current sequences used for anatomic segmentation (black) and additional sequences needed for s-CT generation (blue)

| Sequence                                  | Acquisition Time | BW (Hz/Px) | TE (ms) | TR (ms) | FA (°) | Resolution (mm x mm x mm) | ST (mm) | FOV (mm) |
|-------------------------------------------|------------------|------------|---------|---------|--------|---------------------------|---------|----------|
| <b>SAG T1-3D</b>                          |                  |            |         |         |        |                           |         |          |
| <b>MPRAGE with GADOLINIUM</b>             | 4.59             | 150        | 2.87    | 2200    | 8      | 1.0 × 1.0 × 1.0           | 1       | 255      |
| <b>SAG FLAIR 3D SPACE</b>                 | 5.18             | 592        | 366     | 6000    |        | 1.0 × 1.0 × 1.0           | 1       | 256      |
| <i>T2 SPACE SAG 3D</i>                    | 5.32             | 723        | 99      | 1900    | 160    | 1.0 × 1.0 × 1.0           | 1       | 256      |
| <i>PETRA 3D (Bones)</i>                   | 2.57             | 401        | 0.07    | 3.33    | 6      | 1.5 × 1.5 × 1.5           | 1.5     | 480      |
| <i>T1 VIBE DIXON 3D (Water &amp; fat)</i> | 2.07             | 500        | 2.39    | 6.83    | 10     | 1.5 × 1.5 × 1.5           | 1.5     | 288      |
| <i>FLASH Gradient Echo 2D (Vessels)</i>   | 2.55             | 320        | 3.50    | 7       | 20     | 1.5 × 1.5 × 3.0           | 3       | 288      |
